# Supplementary material for: Molecular determinants for CRISPR RNA maturation in the Cas10–Csm complex and roles for non-Cas nucleases
Source: PubMed Central journal article supplement — Nucleic Acids Res. 2016 Oct 3;45(4):2112–23. doi: 10.1093/nar/gkw891 (PMC5389561; doi:10.1093/nar/gkw891), 2016-10-03
Supplement: gkw891_Supp.pdf [file gkw891_Supp.pdf]

|      |                           |                                                        |
|------|---------------------------|--------------------------------------------------------|
| A422 | TTATGGTTATTCAATTCTCAGATC  |                                                        |
| A423 | ATCAATTTTTGTCCCAATTTTCAG  |                                                        |
| A424 | TTTTGTATACAGGTGGTGGCC     |                                                        |
| A425 | CAAATTACTGCTATATATTCAGGC  |                                                        |
| A426 | TTAAATTTTATTATGAAGCAGGACG |                                                        |
| T7P  | TAATACGACTCACTATAGGG      |                                                        |
| T7T  | TATGCTAGTTATTGCTCAG       | Sequencing<br>confirmation:<br>pET28b-based<br>vectors |

**Table S2. Mass spectrometry analysis of CRISPR-associated proteins that co-purify with Csm2<sup>H6N</sup>.**

| CRISPR-associated protein | Theoretical Mass (KDa) | Unique peptide count | Normalized spectral counts <sup>a</sup> |
|---------------------------|------------------------|----------------------|-----------------------------------------|
| Cas 10                    | 88                     | 61                   | 807.65                                  |
| Csm2 <sup>H6N</sup>       | 17                     | 17                   | 336.37                                  |
| Csm3                      | 24                     | 17                   | 419.80                                  |
| Csm4                      | 34                     | 17                   | 315.96                                  |
| Csm5                      | 39                     | 27                   | 227.21                                  |
| Csm6                      | 50                     | 5                    | 7.99                                    |
| Cas6                      | 29                     | 3                    | 6.21                                    |

a. Values reflect relative protein abundance.

A

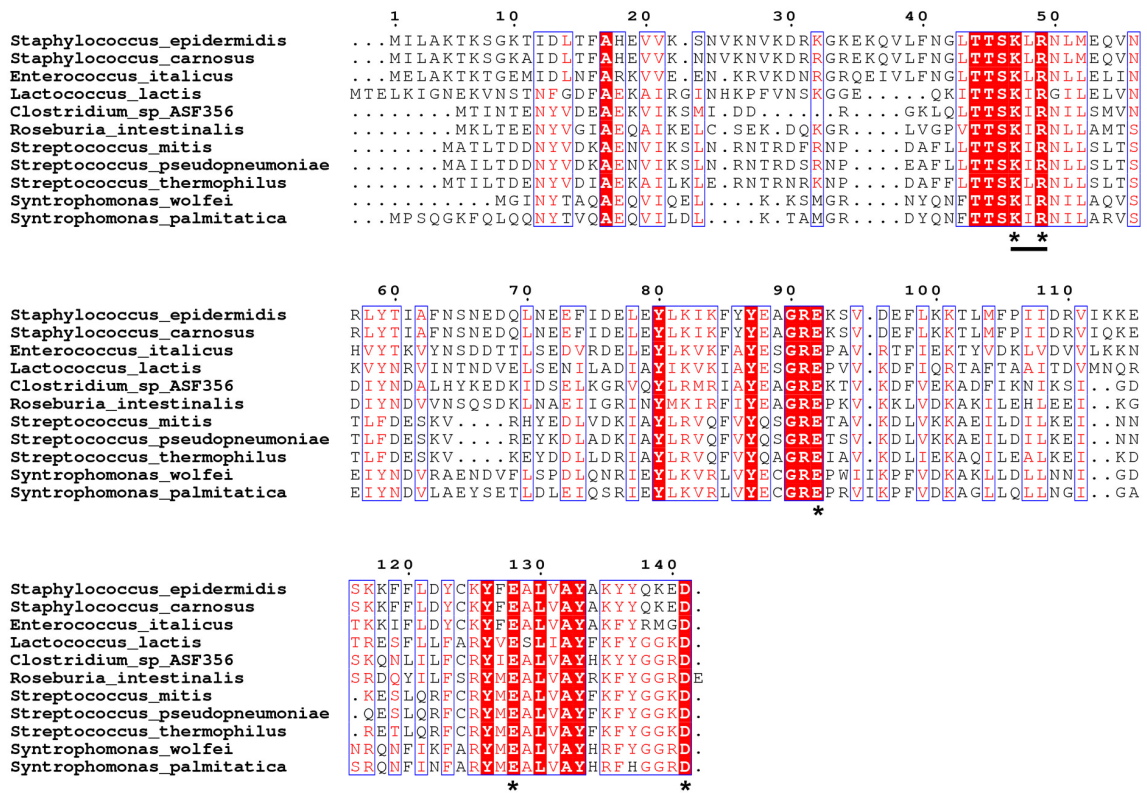

**Figure S1. BLAST sequence alignments of Csm2 (A), Csm3 (B), and Csm5 (C) in indicated organisms. Related to Figure 1.**

Conserved residues are highlighted in red. Residues mutated in this study (asterisks, \*) and previous studies (arrows) are indicated. Underlying bars connect residues that were mutated together. Numbers in italics (1-3) represent references in which previously-characterized mutants were reported as follows: 1, Hatoum-Aslan *et al*, *J Biol Chem*, 2013; 2, Samai *et al*, *Cell*, 2015; 3, Hatoum-Aslan *et al*, *J Bact*, 2014.

B

|                             |                                                                |    |    |    |    |
|-----------------------------|----------------------------------------------------------------|----|----|----|----|
|                             | 1                                                              | 10 | 20 | 30 | 40 |
| Staphylococcus_epidermidis  | .....MYSKIKISGTEVVTGHHIGGGGESSMIGATDSPVVRDLOTKLPIIPGS          |    |    |    |    |
| Enterococcus_italicus       | .....MYSKIRIVGKIDVLTGHHIGGGGETSMIGATDSPVVRDPYSRPLPIIPGS        |    |    |    |    |
| Lactobacillus_salivarius    | .....MLKKIKIEGTIKIETGHHIGGGSTFAAIGATDSPVIKDSLNLPIIPGS          |    |    |    |    |
| Tetragenococcus_muriaticus  | .....MNQFTKIKIEGKIELLSGHVGGSTFAAIGAVDSPVIKDPVNNLPIIPGS         |    |    |    |    |
| Fusobacterium_periodonticum | .....MYTLKKGKLLIKGTIKLITGHHIGTSGDFSAIGAVDTIVIRDSVTKNPKMIPGS    |    |    |    |    |
| Streptococcus_thermophilus  | .....MTFAKIKFSAQIRLETTGHHIGGSDAFSAIGATDSPVIKDPITNLPIIPGS       |    |    |    |    |
| Leptotrichia_hofstadii      | .....MNTLKGKFIITGKIKVLTGHHIGTSGDFSAIGAVDNIIVIRDTVTKNPIIPGS     |    |    |    |    |
| Anaeroglobus_geminatus      | .....MSEQQVLRGRKLIITGTLKLLTGHIGAAKDFAPIGAVDSPVVRDPLTKRPIVPGS   |    |    |    |    |
| Syntrophomonas_wolfei       | .....MYGKILIKCKMTVLTGHHIGGSSAFSAIGAVDSPVIKDSFTGEPMLPGS         |    |    |    |    |
| Megasphaera_micronuciformis | MEVEIMSEQQVLRGRKLMITGKVKLVLTGHIGAAQDFAPIGAVDRFLVVRDPLTKRPIVPGS |    |    |    |    |
| Roseburia_intestinalis      | .....MFAKVKIKISGVLLETITGHHIGGSSAFSAIGAVDSPVIRDARTNMPIIPGS      |    |    |    |    |

|                             |                                                              |    |    |    |    |     |
|-----------------------------|--------------------------------------------------------------|----|----|----|----|-----|
|                             | 50                                                           | 60 | 70 | 80 | 90 | 100 |
| Staphylococcus_epidermidis  | SFKGKMRNLLAKHF.GLKMKE..SHNQDERVLRFLFGSS....EKGNIQRAQLQISDA   |    |    |    |    |     |
| Enterococcus_italicus       | SFKGKMRSLLAKHI.GLIPGQK..MHNQDAPEILRFLFGSS....QKGAIQSSRLQISDA |    |    |    |    |     |
| Lactobacillus_salivarius    | SFKGKMRLLAKAY.NDAPLTSGTSANNQDYRDKRFLFGATTQN..EDGQLIIGRLIFRDS |    |    |    |    |     |
| Tetragenococcus_muriaticus  | SFKGKMRLLAQAM.NQKIAEN...PNQDSDKITRFLFGASTGGGENGEQIIRGNLIFRDS |    |    |    |    |     |
| Fusobacterium_periodonticum | SFKGKMRLLARTKYHS..SLELDDIKKEDVCIKRLFGSS....EPIMSSRLQFODT     |    |    |    |    |     |
| Streptococcus_thermophilus  | SFKGKMRLLAKVY.NEKVAEK...PDDDSDIISRFLFGNS....KDKRFKMGRLIFRDA  |    |    |    |    |     |
| Leptotrichia_hofstadii      | SFKGKMRLLSRTKYNDNSTLTPMSIKKESDNIKRLFGAS....EKPIITLRLQFCDM    |    |    |    |    |     |
| Anaeroglobus_geminatus      | SFKGKLRLLAKAE.ATGYVLN..KIDDDSDLKRLFGSA....GKDSARPSRLQFYDL    |    |    |    |    |     |
| Syntrophomonas_wolfei       | SFKGKMRLLAKAI.KNHYITQ..EPAKDPEELKRLFGTAGDN.RKQEWPKAARLQFYDA  |    |    |    |    |     |
| Megasphaera_micronuciformis | SFKGKLRLLAKAE.ATGYVLN..KINDDSELKRLFGSA....GKDATRPSRLQFYDL    |    |    |    |    |     |
| Roseburia_intestinalis      | SFKGKLRLLAKKY.NQTVAKT...PDDDAVCLTSLFGSA....KKGQVKTSKILFNDDM  |    |    |    |    |     |

|                             |                                                                 |     |     |     |     |
|-----------------------------|-----------------------------------------------------------------|-----|-----|-----|-----|
|                             | 110                                                             | 120 | 130 | 140 | 150 |
| Staphylococcus_epidermidis  | FFSKTKEHFAQ..NDIAYETKFKENTINRLTAVANPROHERVTRGSEFDVVFVYINVDDEE   |     |     |     |     |
| Enterococcus_italicus       | FFSKASQEEFDK..KDLAYETKFKENTISRLTAVANPROHERVTRGASFDFFHIYINVENI   |     |     |     |     |
| Lactobacillus_salivarius    | ILSNKEELAQ.L..GAKSYETKFKENTINRFTAATPROHERVIRGSKFDFFELIYDVEKE    |     |     |     |     |
| Tetragenococcus_muriaticus  | FLLTNKASLDE.L..GIKTYETKFKENTINRRTABASPROHERSIRGQSFDFELIYELDNQ   |     |     |     |     |
| Fusobacterium_periodonticum | LLSDKSIIEEFKEFEDLPHETIKYENTIDRTTGIANPROHERVPAAGSEDFQIIVYVVEDA   |     |     |     |     |
| Streptococcus_thermophilus  | FLLSNADELDS.L..GVRSYETKFKENTIDRITABANPROHERAIRNSTDFDFELIYEITDE  |     |     |     |     |
| Leptotrichia_hofstadii      | LLESEKEYE..RDVEFDLPYETIKYENTIDRGTGVANPROHERVPAAGSEDFDFRLIYNVENA |     |     |     |     |
| Anaeroglobus_geminatus      | KMAEESVEKFNSLDLDYIETIKFKENTISRLTAVANPROHERVPAAGIFDFDKLVYINIEKE  |     |     |     |     |
| Syntrophomonas_wolfei       | FLVNADTLKN...RSGMETVVKFENTINRLTAVANPROHERVVRGSEFAINLVYDMEDT     |     |     |     |     |
| Megasphaera_micronuciformis | RMTDESVEKFSLLDLDYIETVVKFENTISRLTAVATPROHERVVPAGSEFGFKLVYINIERE  |     |     |     |     |
| Roseburia_intestinalis      | FLENMDELKY.A..GLTGAETVVKFENSTORTAVANPROHERVVRGAKFPMQLIYEVTDDE   |     |     |     |     |

|                             |                                                                 |     |     |     |     |     |
|-----------------------------|-----------------------------------------------------------------|-----|-----|-----|-----|-----|
|                             | 160                                                             | 170 | 180 | 190 | 200 | 210 |
| Staphylococcus_epidermidis  | ...SQVEDDFENIEKAIHHLLENDYLGCGGTRGNRIRIQRKDTNIEVTVGGEYDST.NLKI   |     |     |     |     |     |
| Enterococcus_italicus       | ...NEVMADDFENIKTAIHHLLENDYLGCGGTRGNRIRIRFVIDSIDTVVGFDFDSS.NLSIK |     |     |     |     |     |
| Lactobacillus_salivarius    | ...SEVEDDIQLVKTGLEHLENDYLGCGGSRGVGKVKFENLISIKSVLGDYDVK.GLDAI    |     |     |     |     |     |
| Tetragenococcus_muriaticus  | ...EEAIBDFETILSGLEHLENDYLGCGGSRGVGKIGFKDITASTVFGGYDAS.SLNEQ     |     |     |     |     |     |
| Fusobacterium_periodonticum | E...EVKDDMENILLMMDVLEDDYLGCGGTRGVGRIKFKNLSLELTFYTEENKKAALAKV    |     |     |     |     |     |
| Streptococcus_thermophilus  | N...ENQVEDDFKVIIRDGLKLELDYLGCGGSRGVGKVAFENLKAATTVGTNYDVK.TLNEL  |     |     |     |     |     |
| Leptotrichia_hofstadii      | EKMEEEVKQDFENILMFELEDDYLGCGGTRGVGRVKFEDLKLTEKVIYIKENEDDIEYL     |     |     |     |     |     |
| Anaeroglobus_geminatus      | ...DELKEDIQQLGTALEHLEDDYLGCGGSRGVGKVAFENLTVQDKFVKNEAVDCSEC      |     |     |     |     |     |
| Syntrophomonas_wolfei       | ...DSLKSDFTNARGLKLLEHLEDDYLGCGGSRGVGKVGFTDFEVVVKGECEPED.VDILL   |     |     |     |     |     |
| Megasphaera_micronuciformis | ...GELKEDIQALGTALEHLEDDYLGCGGSRGVGKIAFEDLAVQDKFVKNGEAVDCNEC     |     |     |     |     |     |
| Roseburia_intestinalis      | ...SEMVDHFEILKDGFLLEHLEDDYLGCGGSRGVGRVKIMDILRVPEVPIGEVSED.VLSQC |     |     |     |     |     |

|                             |                       |
|-----------------------------|-----------------------|
| Staphylococcus_epidermidis  | .....                 |
| Enterococcus_italicus       | .....                 |
| Lactobacillus_salivarius    | LEG.....              |
| Tetragenococcus_muriaticus  | LKELL.....            |
| Fusobacterium_periodonticum | EKEIEKIRKELESKVE..... |
| Streptococcus_thermophilus  | LTAEV.....            |
| Leptotrichia_hofstadii      | KSEIQNIKDFSVRFGE..... |
| Anaeroglobus_geminatus      | ENWLKGC.....          |
| Syntrophomonas_wolfei       | LKILKEVEDYGAFSIQ..... |
| Megasphaera_micronuciformis | ENWLKGC.....          |
| Roseburia_intestinalis      | KKIMSAVE.....         |

C

```
1      10     20     30     40     50
Staphylococcus_epidermidis  . . . M T I K N Y E V V I K T L G P T H T G S G Q V M K K Q D Y T Y D F Y N S K V Y M I N G N K L V K F L K R . . K N L
Staphylococcus_carnosus    . . . M T I K N Y E V I I K T L G P V H T G S G Q I M K K Q D Y T Y D F Y N S K V Y M I N G N K L V K F L K R . . K N L
Syntrophomonas_palmitatica M R Y G H L E T H H L T L R T L A P V H T G S G E R L H K K E Y T F D S R Q G R I Y F P D F R L L V E F L K S . . R G L
Catonella_morbi            . M E D Y L I N Y E L K I K I L T P V Y T G S G Y T V G K R E Y T H D K S K N L V S F L D L E K L F K G I L D . . N G L
Syntrophomonas_wolfeii     M K F A H L E R L N L T L R A L A P V H T G S G E Q L G K K E Y T F D S P N A L I Y F P D F R L V A F L K E . . R S L
Lactobacillus_salivarius    . . M L K R Q D Y E F V L Y T L A P V H T G S G V K V T S K E S T Q E . . N G E Y Y F P E M D K L Y L F L E K N H P E S
Streptococcus_salivarius    . M K N D Y R T F K L S L L T L A P I H T G N G E K Y T S R E E T Y E . . N K K F Y F P D M G K F Y N K M V E . . K R L
Streptococcus_thermophilus . M K N D Y R T F K L S L L T L A P I H T G N G E K Y T S R E E T Y E . . N K K F Y F P D M G K F Y N K M V E . . K R L
Streptococcus_mitis        . M K T D Y R V F Q F T L L A M A P T H T G S G E K Y T S R E E T Y E . . N H R Y Y F P D M G K F Y N R M I E . . N G L
Lactobacillus_delbrueckii   . M K Q Y R E F E F K L R T L A P V H T G S G E T Y K Q R E Y T Y E . . N D A Y Y F P D F V T L Y R K L S S N . Q R Q
Tetragenococcus_muriaticus . . M V K R K N Y Q L T L R V M G P L H T G S G K I Y T Q K E Y T Y E . . N G F Y Y F P D M G S L Y K E L R K Q G D G L
```

3

```
60     70     80     90     100    110
Staphylococcus_epidermidis  L Y T Y Q N F I L R Y P . . P K N P R E N G L K D Y L D A Q N V K Q S E W E A F V S Y S E K V N Q G K K Y G N T R P K P L
Staphylococcus_carnosus    L D S Y Q N F I L R Y P . . P K N P R E N G L K D Y L D A Q N V K Q S E W K A F V S Y S E K V N Q G K K Y G N I R P K P L
Syntrophomonas_palmitatica L A K Y E Q F L Q P R . Q . . . . N D F K T F L H E N E V G E K D Y S V F V N Y C I D A G E A . . . . . A R T V N F
Catonella_morbi            L A E Y E K Y F T A D N . K N R E M N V L K Q F L E R A G I G E D K Y S E W I T Y S E Y M G S . . . . . N L S L Q N T
Syntrophomonas_wolfeii     L P A F E Q Y L L D S G S K T N K R K S R L I D F L N D Q K I K E R D F G G F K I K Q N N . . . . . L V E R L
Lactobacillus_salivarius    D E K F E A F L I Q T R . P . N A R N N R L V S F L D D N R I K D R S F G G Y S I S E T G L E S D R N P . . N S A G A I
Streptococcus_salivarius    A E K F E A F L I Q T R . P . N A R N N R L V S F L D N N R I A E R S F G G Y S I S E T G L E S D K N P . . N S A G A I
Streptococcus_thermophilus D R K F E Q F L Q E T K . P . S A R N N R L I S F L D N N R I S E R S F G G Y T I T E T G L E T E K N N Q P R S G S I
Streptococcus_mitis        Q E A F E N Y L M S S R R . . Q E K N I R L G E F R K I N F T D R D L G G Y S I K A T G E V E N N G . . D P D R L
Lactobacillus_delbrueckii   T S T F E B E L M Q N R . N G N H I K P R L I Q F L N D Q K I S T R D F D G Y R I K E H G F E L E K K . . T A K G N L
Tetragenococcus_muriaticus
```

```
120    130    140
Staphylococcus_epidermidis  N D L H L M V R D G Q N K V Y L P G S S I K G A I K T L V S K Y N N . . . . .
Staphylococcus_carnosus    N D L H L M V R D G Q N K V Y L P G S S I K G A I K T A L V S K Y D N . . . . .
Syntrophomonas_palmitatica Q E V L T F I K D G S G Y F Y I P G S S I K G A I R T A L A A W L M K T G S . . W E R E K R D I E S A E A P R Q I R Y Y
Catonella_morbi            H E I Q T F I K D A Y G N E Y I P G S S I K G A I T I L E S N Y I R K K Y N E F D R S R A E V K E G M K . G K T R Y
Syntrophomonas_wolfeii     R E V L T F I K D S K G Y F Y I P G S S I K G A I R T A L A T Y L L K R G D . . W E R D R N I E G D S S V P A R K Y
Lactobacillus_salivarius    N E V S L F A R D G L G R R Y I P G S S I K G A I R T I L E S E Y F . . . . .
Streptococcus_salivarius    N E V N K F I R D A F G N F Y I P G S S I K G A I R T I L M N T P K . . . . . W N N E N A V N N F G R F P . . . . .
Streptococcus_thermophilus N E V N K F I R D A F G N F Y I P G S S I K G A I R T I L M N T P K . . . . . W N N E N A V N D F G R F P . . . . .
Streptococcus_mitis        N E V A K F M R D A F G K F Y I P G S S I K G A I R T I L M N T N P E . . . . . W N N K N A V D F R G R S P . . . . .
Lactobacillus_delbrueckii   N E I A K F I K D P Q G R E Y I P G S S I K G A I R T I L I N T R F K . . . . .
Tetragenococcus_muriaticus N E I S A F V K D P Y G Y F Y I P G S S I K G A I R T I L V N E Y F . . . . .
* * * * *
```

```
150    160    170    180
Staphylococcus_epidermidis  . . . . . E K N K D I Y S K I K V S D S K P I D E S N L A T Y Q K I D I N
Staphylococcus_carnosus    . . . . . E K N K D V Y S K I K V S D S E P I D E R H L A I Y Q K I D I N
Syntrophomonas_palmitatica L S N E N S R L E K T V F C R L G I Q D P R G K P V S G P V N D F M Q A I R I S D S A L V N F N L T I T G K Y D R K
Catonella_morbi            M S V P Q N H L K E K V F H R Q I . . T D E R V K L E N M Q N D I M R G T I V G D S L S I D K N S L C I C Q K I D L S
Syntrophomonas_wolfeii     L A R E S T V E K K V F Y Q L D I R N P K D G K E I S S P I N D L M Q G I R I S D S A A L S F L T G K Y D R K
Lactobacillus_salivarius    . . . . . R G . . . . . K Q I . . . . . S W G A R S G Q Q P D D I F N N T I R V G D S N T I G E S N F S I V Q K W D Y A
Streptococcus_salivarius    . . . . . K E N K . . . . . N L I . . . . . P W G P K K G K E Y D D L F N A I R V S D S K P F D N K S L I L V Q K W D Y S
Streptococcus_thermophilus . . . . . K E N K . . . . . N L I . . . . . P W G P K K G K E Y D D L F N A I R V S D S K P F D N K S L I L V Q K W D Y S
Streptococcus_mitis        . . . . . K E N K . . . . . K M I . . . . . P W G A K K G Q E F N D L F H A I R V S D S E P F N N E Q I I L V Q K W D Y S
Lactobacillus_delbrueckii   . . . . . G V . . . . . E K I . . . . . P W G G . . . . . S D D I F H D I R V S D S E P I K L S S L V I T K K W D Y N
Tetragenococcus_muriaticus . . . . . H T . . . . . D N I . . . . . P W G P K A . . E A D D I F H N I H V S D S E P I S L E Q L I L A Q K W D S
```

\*

\*

\*

```
190    200    210    220
Staphylococcus_epidermidis  K . . S E R S M P L Y R E C I D V N T E I K F K L T I E . . . . . D E I Y S I N E I E Q S I Q D F Y K N
Staphylococcus_carnosus    K . . S E R S M P L Y R E C I D V D A E I K F K L T I E . . . . . D E I Y S I N E I E Q S I R D F Y K N
Syntrophomonas_palmitatica P D . G T V N P L P I R E C L I P G T E V N F T M T L D V T M L A R V G . . L N I E R I E T A L H E F A D A H Y A N
Catonella_morbi            T K . G N K K S L N V L R E C L K P G T V V T V P L T I D S K I V R N M Y G K K F D L E D I K A D I N M F . . . . Y K N
Syntrophomonas_wolfeii     P D . G T V N L L P I R E C L T P G S E A H L Q L T L D L P M L A R V G . . L N A G I I E E A L H D F A D E H Y A H
Lactobacillus_salivarius    R N . K D P K P M P I Y R E S L Q P L K K I T F N I S A V G E . . . . . E A I S L I D N L E N I A E K H Y L Y
Streptococcus_salivarius    A K T N K A K P L P L Y R E S I S P L T K I E F E I T T T T D . . . . . E A G R L I E E L G K R A Q A F Y K D
Streptococcus_thermophilus A K T N K A K P L P L Y R E S I S P L T K I E F E I T T T T D . . . . . E A G R L I E E L G K R A Q A F Y K D
Streptococcus_mitis        A K S L T A K P L P L Y R E A I A P L T K I N F T I T T T K . . . . . E A G I L I E E L G Q R A Q A F Y K E
Lactobacillus_delbrueckii   T R K D G P N P L P L T R E C L K P Y T K V I F I T I T V G D . . . . . E A A E I I S G L S K A A D E F Y K R
Tetragenococcus_muriaticus P E K L T A R S L P I H R E S L K P M T A V H E T V T A V G D . . . . . R A I Q L I D Q L P Q P A K K Y Y Q K
```

\*

```
230    240    250    260    270    280
Staphylococcus_epidermidis  Y Y D K W L V . G F K E T K G G R R F A L E G G I P D V L N Q N I L F L G A G T C F V S K F T H Y Q L K N R K Q A K Q D
Staphylococcus_carnosus    Y Y D K W L I . G F K E T K G G R R F A L E G G M P D V L N Q N I L F L G A G A G F V S K F T H Y Q L K S R E Q A K R D
Syntrophomonas_palmitatica F E Q H F Y E . L P N D A E V S . . . . . A N R G V D I I L G G A G Y V S K F T L T Y N L Y S R H E Q A L P
Catonella_morbi            Y K D E Y I T . K F K N F P Q I . . . . . I E E K N A F Y L G G S G Y V S K F T V T H S L F N E D . N A T K
Syntrophomonas_wolfeii     F E Q Y F A E . L P E D A S V A . . . . . A K E G V D I F L G G G V G Y V S K F T L T Y N L P P Q R E N A V S
Lactobacillus_salivarius    Y R K F F L D N N F D K K Y I Q . . . . . N N I K A P I Y L G A G S C I W T K T N I R Q M D D E K I N A I R
Streptococcus_salivarius    Y K A F F L S . E F P D D K I Q . . . . . A N L Q Y P I Y L G A G S G A W T K L F K Q A D G I L Q . . . R
Streptococcus_thermophilus Y K A F F L S . E F P D D K I Q . . . . . A N L Q Y P I Y L G A G S G A W T K L F K Q A D G I L Q . . . R
Streptococcus_mitis        Y K N F F L S . D F P E N K I Q . . . . . P N L Q Y P I Y L G A G S G A W T K L F E Q A D G I L Q . . . K
Lactobacillus_delbrueckii   Y E E R F L K . D L D P K Y R Q . . . . . S G Y N H P I Y L G G S G L W T K A N Y D R I N I E Q . . . I R
Tetragenococcus_muriaticus Y T N K F L V . D F P A R F I Q . . . . . T Y F W S P I Y L G A G S G F W T K T D I T K A D N S R Y . . . K
```

3

|                            | 290           | 300       | 310       | 320               |
|----------------------------|---------------|-----------|-----------|-------------------|
| Staphylococcus_epidermidis | SFEI.LTKKFR.. | GTYGKMK   | KEIPSN.VP | V                 |
| Staphylococcus_carnosus    | SFDI.LSKKFR.. | RTYGKMK   | KEIPSN.VP | V                 |
| Syntrophomonas_palmitatica | LVSKI.LLKQF.P | KH..G.... | HHRD      | V                 |
| Catonella_morbi            | VVSEI.LNEVFTQ | KSKPS.... | ANKDD.... | EVLGVSPHILKCTYYLE |
| Syntrophomonas_wolfei      | LAAKI.LTKQFSP | KH..G.... | HSKDA.... | SQYKVS            |
| Lactobacillus_salivarius   | RKQY.VKMRMKD  | KGVMK.L   | TKYPTN... | VDSKIVKTK         |
| Streptococcus_salivarius   | RYSR.MKTKMVK  | KGVLK.L   | TKAPLKTVK | I                 |
| Streptococcus_thermophilus | RYSR.MKTKMVK  | KGVLK.L   | TKAPLKTVK | I                 |
| Streptococcus_mitis        | RYSR.MKTKMVG  | KGVLK.L   | TKAPDKS   | I                 |
| Lactobacillus_delbrueckii  | SRTP.RKMKMTG  | NGVFK.L   | TKAKRQSYR | L                 |
| Tetragenococcus_muriaticus | K..R.GKMSMKG  | KGVLK.L   | TKAPMVKYR | L                 |

|                            | 330            | 340 |
|----------------------------|----------------|-----|
| Staphylococcus_epidermidis | MCKVSFQELNNEVL |     |
| Staphylococcus_carnosus    | MCKLSFQELNNEVL |     |
| Syntrophomonas_palmitatica | RCELVFD.....   |     |
| Catonella_morbi            | LCRIVD.....    |     |
| Syntrophomonas_wolfei      | KCELIITR.....  |     |
| Lactobacillus_salivarius   | KCNFEVKKKS...  |     |
| Streptococcus_salivarius   | KANFMIKEIDK..  |     |
| Streptococcus_thermophilus | KANFMIKEIDK..  |     |
| Streptococcus_mitis        | KANFMIREILQ..  |     |
| Lactobacillus_delbrueckii  | KCCFTIKEKK...  |     |
| Tetragenococcus_muriaticus | KCVFSLKEGK...  |     |



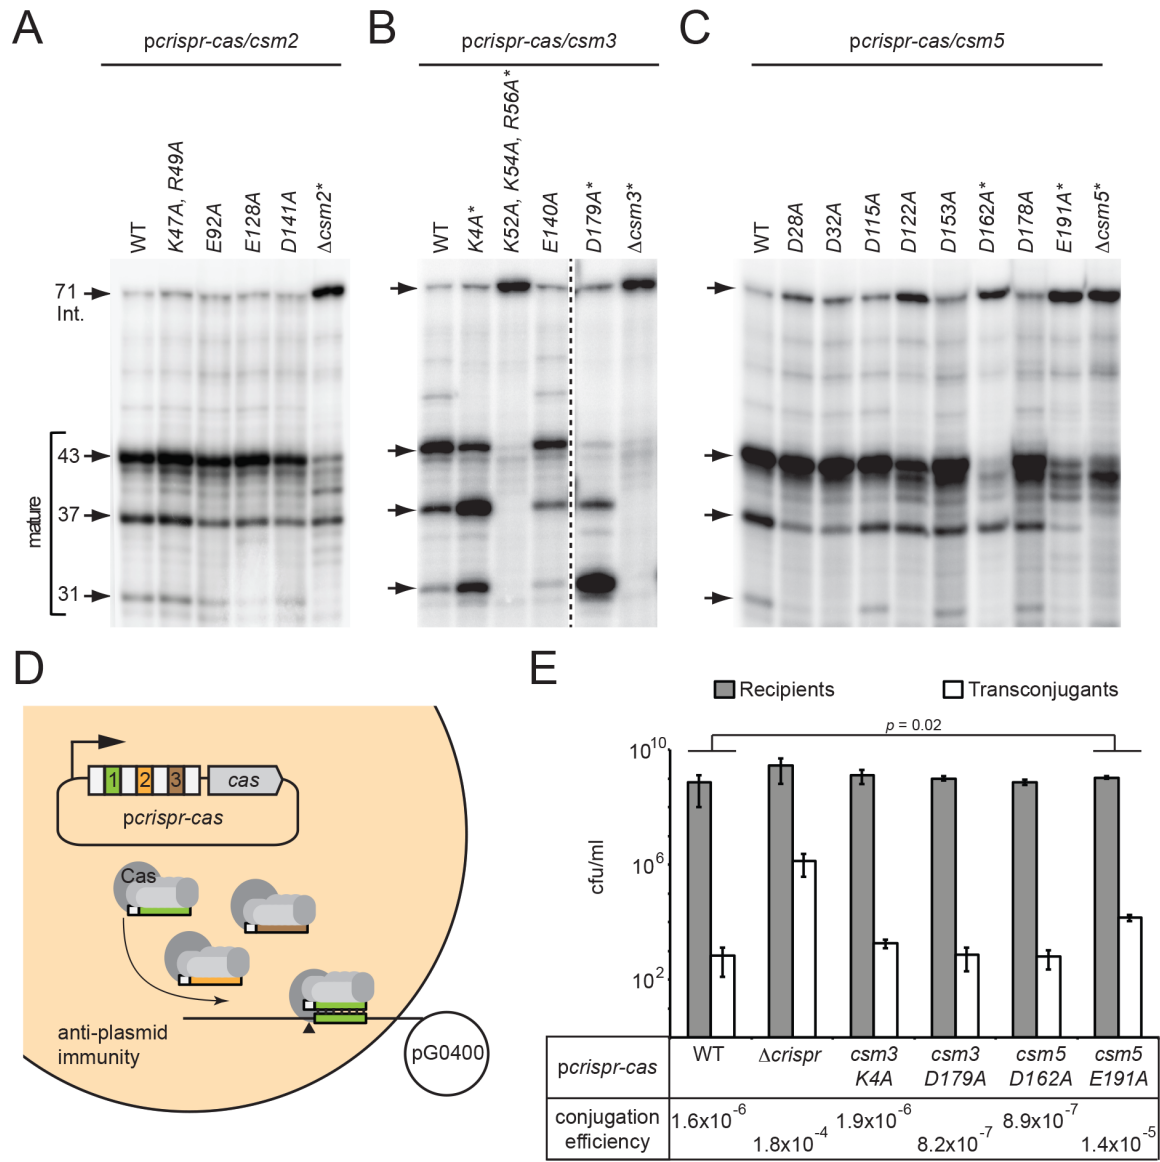

**Figure S2. Conserved residues in Cas10-csm impact crRNA length distribution, maturation efficiency, and anti-plasmid immunity. Related to Figures 2 and 3.**

*Spc1* crRNAs in the presence of mutations in Csm2 (A), Csm3 (B), and Csm5 (C) are shown. Mutations were introduced into *pcrispr-cas*, expressed in *S. aureus* RN4220, and confirmed in *S. epidermidis* LM1680 if a maturation defect was observed (\*). *Spc1* crRNAs were captured from total RNA extracts using a biotinylated oligonucleotide probe antisense to *spc1*, radiolabeled on their 5' ends, and resolved using denaturing PAGE. The dotted line in (B) separates non-contiguous lanes in the same gel. (D) The conjugation assay used to measure anti-plasmid immunity in which *pcrispr-cas* provides *spc1*-mediated immunity against the conjugative plasmid pG0400. (E) Efficiency of pG0400 transfer in the presence of indicated *pcrispr-cas* constructs in *S. epidermidis* LM1680 (used as recipients). Conjugation was carried

out in triplicate; the values (in cfu/ml; mean +/- S.D.) obtained for recipients and transconjugants are shown. Conjugation efficiency is calculated as the average numbers of transconjugants/recipients. The significant difference between conjugation efficiencies observed for wild-type CRISPR-cas and the *csm5*<sup>E191A</sup> mutant variant (t-test,  $p=0.02$ ) is indicated.

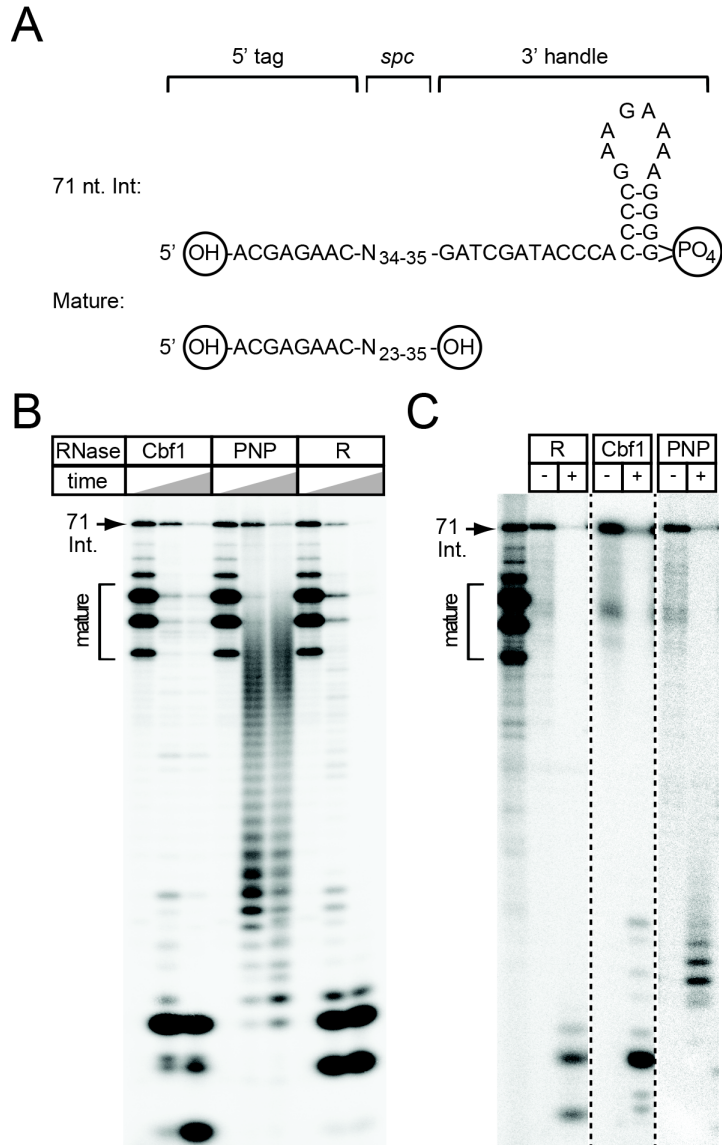

**Figure S3. Cellular nucleases degrade both intermediate and mature crRNAs. Related to Figure 4.**

(A) Sequences and end-features of intermediate and mature crRNAs are shown. Intermediate crRNAs possess a “3’ handle” consisting of structured repeat sequence and a 2’,3’-cyclic phosphate group, both of which might pose a barrier to 3’-5’ exonucleases. (B) The activities of cellular exonucleases Cbf1, PNPase (PNP) and RNase R (R) against intermediate and mature crRNAs extracted from wild-type Cas10-Csm complexes are shown. CrRNAs were radiolabeled on their 5’ ends, and used as substrates in nuclease assays containing  $Mg^{2+}$  (PNPase and RNase R) or  $Mn^{2+}$  (Cbf1). Indicated nucleases (1 pmol) were added, and the reaction was allowed to proceed at 37°C for 0, 5, or 10 minutes. (C) Intermediate crRNAs purified from Cas10-Csm/ $\Delta$ Csm5 complexes were challenged with cellular exonucleases as

described for panel B. Reactions were allowed to proceed at 37°C for 10 minutes. The leftmost lane contains uncut, wild-type crRNAs as a reference. RNAs were resolved using denaturing PAGE. Dotted lines separate lanes derived from different gels.

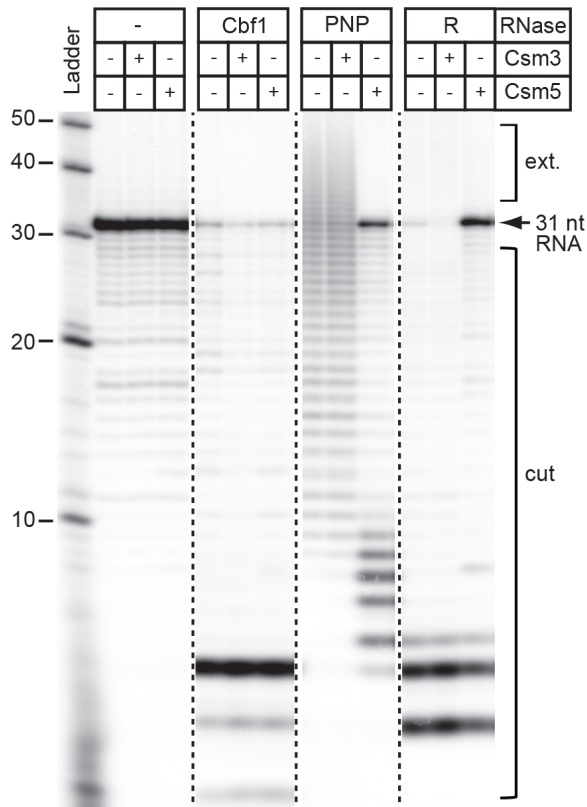

**Figure S4. Csm3 does not impact the activity of cellular nucleases. Related to Figure 4.**

A 31-nucleotide RNA substrate radiolabeled on the 5'-end (Fig. 3E) was pre-incubated for 2 minutes with Csm3 or Csm5 (4 pmols) where indicated in a buffer containing  $Mg^{2+}$  (PNPase and RNase R) or  $Mn^{2+}$  (Cbf1). Indicated nucleases were then added (1 pmol), and the reaction was allowed to proceed at 37°C for 10 minutes. RNAs were resolved using denaturing PAGE. Dotted lines separate non-contiguous lanes in the same gel.

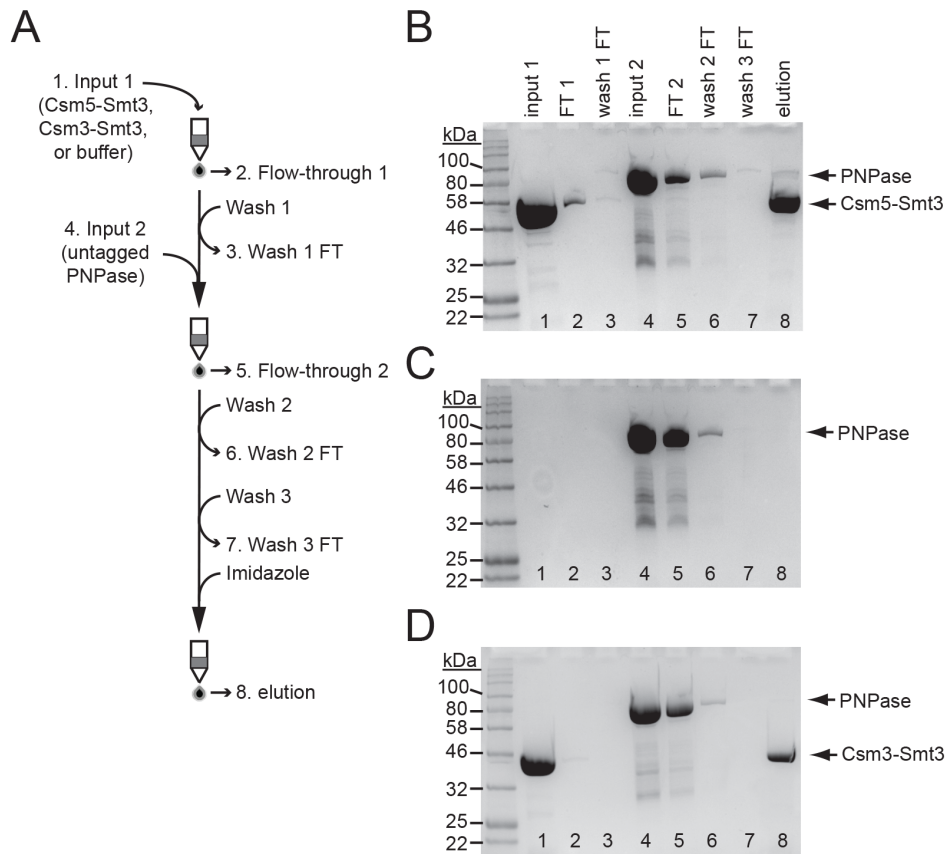

**Figure S5. PNPase associates with Csm5, but not Csm3. Related to Figure 5.**

(A) Illustration of the experimental flow of a pull-down assay in which 10-His Smt3-tagged Csm proteins (Csm3-Smt3 or Csm5-Smt3) or dialysis buffer are loaded onto a column containing Ni<sup>2+</sup>-agarose beads, and their interaction with untagged PNPase is assessed by their ability to bind and retain PNPase in the column after thorough washing. (B-D) Csm5-Smt3 (1 nmol, panel B), dialysis buffer (panel C), or Csm3-Smt3 (0.5 nmol, panel D) were applied to the column in the first step as “input 1”. For all experiments, PNPase (0.7 nmol) was applied as “input 2”. Samples were collected at each numbered step outlined in the experimental flow (panel A), and resolved using SDS-PAGE. Shown is a representative of three (Csm3-Smt3), four (Csm5-Smt3) or eight (dialysis buffer) replicates. Signal intensities of PNPase in the final elutions (+/- S.D.) are as follows: Panel B, 5.9% +/- 2.4; Panel D, 1.2% +/- 0.8. FT, flow-through.

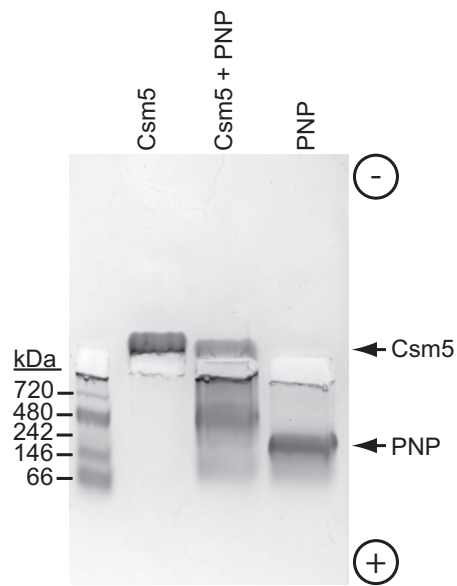

**Figure S6. PNPase associates with Csm5. Related to Figure 5.**

Csm5 and PNPase (100 pmols each) were resolved on a 5% horizontal native gel with wells cast in the center of the gel. The position of (+) and (-) electrodes are indicated. NativeMark Protein Standard (Thermo Fisher Scientific) was used to estimate molecular weight for proteins migrating toward the (+) electrode. Proteins were visualized with Coomassie G-250. Shown is a representative of four independent trials.
